# Supplementary material
Source: PubMed Central journal article supplement (PMC5527921)
Supplement: MOL2-4-539-s004.pdf [file MOL2-4-539-s004.pdf]

## Supplementary figure 3. Protein identification by MALDI-TOF-MS

### a. Mascot search results

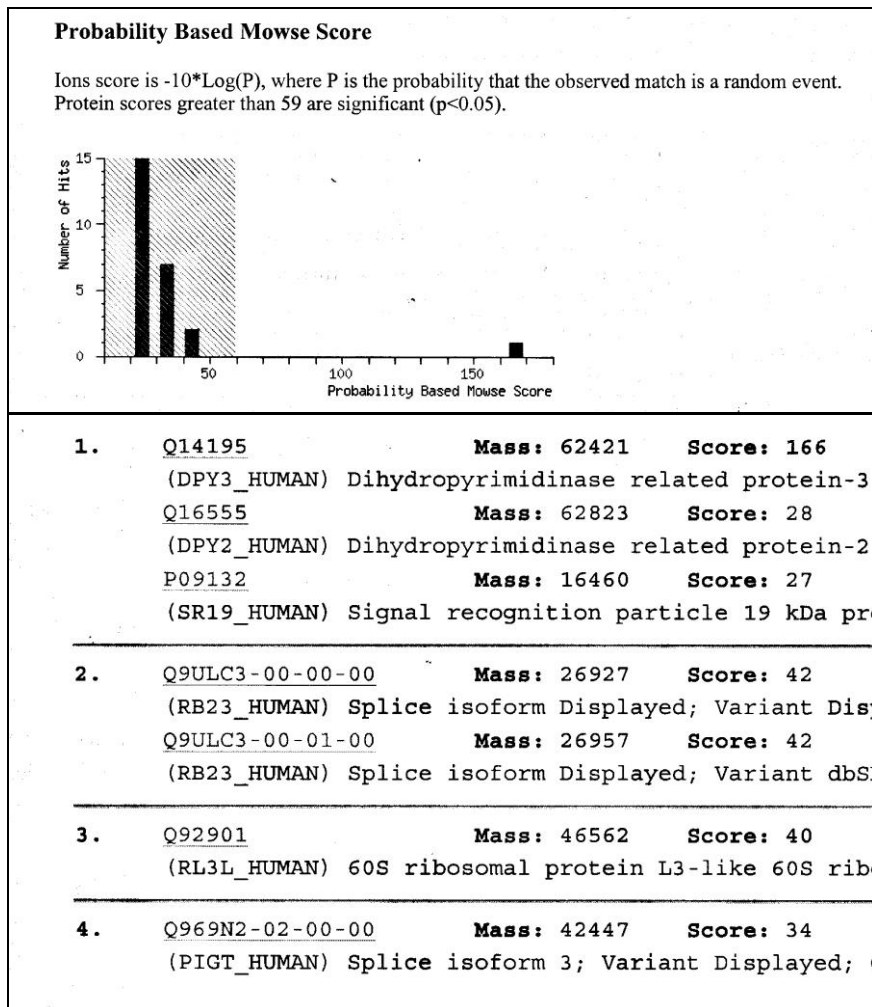

### b. The sequence coverage of identified DRP3 protein

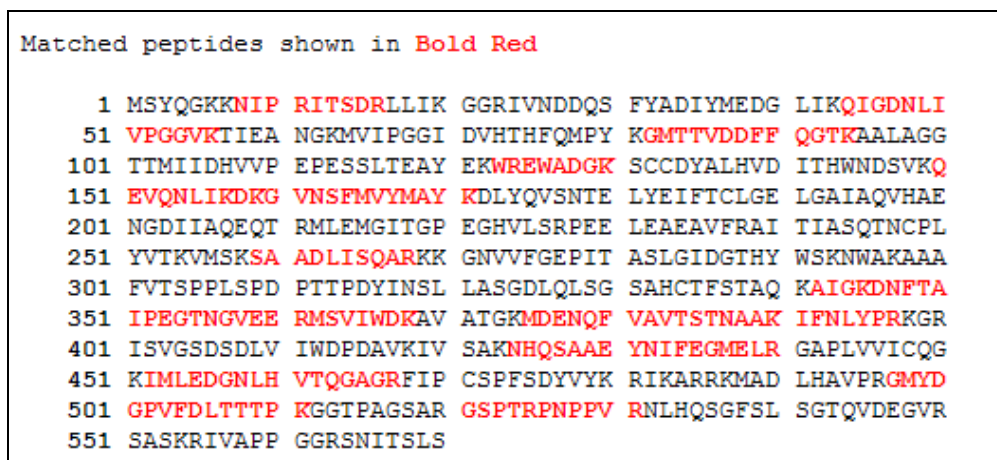

### c. Peptides recognized by Peptide Fingerprinting and their position within protein sequence

| Start - End | Observed  | Mr (expt) | Mr (calc) | ppm | Miss | Sequence                            |
|-------------|-----------|-----------|-----------|-----|------|-------------------------------------|
| 362 - 368   | 878.4500  | 877.4427  | 877.4368  | 7   | 0    | R.MSVIWDK.A                         |
| 391 - 397   | 922.5200  | 921.5127  | 921.5072  | 6   | 0    | K.IFNLYPR.K                         |
| 150 - 157   | 971.5600  | 970.5527  | 970.5447  | 8   | 0    | K.QEVQNLIK.D                        |
| 259 - 268   | 1031.5700 | 1030.5627 | 1030.5407 | 21  | 0    | K.SAADLISQAR.K                      |
| 123 - 130   | 1047.5300 | 1046.5227 | 1046.4934 | 28  | 1    | K.WREWADGK.S                        |
| 8 - 16      | 1071.5600 | 1070.5527 | 1070.5832 | -29 | 1    | K.NIPRITSDR.L                       |
| 521 - 531   | 1177.6200 | 1176.6127 | 1176.6364 | -20 | 0    | R.GSPTRENPPVR.N                     |
| 44 - 56     | 1309.7500 | 1308.7427 | 1308.7402 | 2   | 0    | K.QIGDNLIVPGGVK.T                   |
| 82 - 94     | 1446.6900 | 1445.6827 | 1445.6497 | 23  | 0    | K.GMTTVDDFFQGTK.A                   |
| 82 - 94     | 1462.6900 | 1461.6827 | 1461.6446 | 26  | 0    | K.GMTTVDDFFQGTK.A Oxidation (M)     |
| 497 - 511   | 1657.8100 | 1656.8027 | 1656.7706 | 19  | 0    | R.GMYDGPVFDLTTTPK.G Oxidation (M)   |
| 158 - 171   | 1668.8500 | 1667.8427 | 1667.7687 | 44  | 1    | K.DKGVNSFMVYMAYK.D Oxidation (M)    |
| 452 - 467   | 1710.8800 | 1709.8727 | 1709.8519 | 12  | 0    | K.IMLEDGNLHVTTQAGR.F                |
| 375 - 390   | 1725.8600 | 1724.8527 | 1724.8039 | 28  | 0    | K.MDENQFVAVTSTNAAK.I                |
| 452 - 467   | 1726.8600 | 1725.8527 | 1725.8468 | 3   | 0    | K.IMLEDGNLHVTTQAGR.F Oxidation (M)  |
| 375 - 390   | 1741.7900 | 1740.7827 | 1740.7989 | -9  | 0    | K.MDENQFVAVTSTNAAK.I Oxidation (M)  |
| 346 - 361   | 1748.8400 | 1747.8327 | 1747.8013 | 18  | 0    | K.DNFTAIPEGTNGVEER.M                |
| 424 - 440   | 2008.9400 | 2007.9327 | 2007.9108 | 11  | 0    | K.NHQSAAEYNIFEGMELR.G               |
| 424 - 440   | 2024.9400 | 2023.9327 | 2023.9057 | 13  | 0    | K.NHQSAAEYNIFEGMELR.G Oxidation (M) |
| 342 - 361   | 2118.0700 | 2117.0627 | 2117.0389 | 11  | 1    | K.AIGKDNFTAIPEGTNGVEER.M            |

d. Sequence homology between DRP3 and DRP1 demonstrated by BLAST analysis

| 86.0%                                        |                                                                      |
|----------------------------------------------|----------------------------------------------------------------------|
| Graphical alignment                          |                                                                      |
| In original sequence: 1 - 569 ( total: 570 ) |                                                                      |
| Raw alignment                                |                                                                      |
| Query                                        | : MSYQGKKNIPRITSDRLLIKGGRIVNDQSFYADIYMEDGLIKQIGDNLIVPGGV 1-55        |
|                                              | : MSYQGKK+IP ITS DRLLIKGGRI+NDDQS YAD+Y+EDGLIKQIG+NLIVPGGV           |
| Q14194                                       | : MSYQGKKSIPHITSDRLLIKGGRIINDDQSLYADVLEDGLIKQIGENLIVPGGV 1-55        |
| Query                                        | : KTIENGKMPVPGGIDVHTHFQMPYKGMTTVDDFFQGTKAALAGGTTMIIDHVVP 56-110      |
|                                              | : KTIENG+MVPVPGGIDV+T+ Q P +GMT DDFQGT+AAL GGTTMIIDHVVP              |
| Q14194                                       | : KTIENGKMPVPGGIDVNTYLQKPSQGMTAADDFFQGTAAALVGGTTMIIDHVVP 56-110      |
| Query                                        | : EPESLLEAYEKWREWADGKSCCDYALHVDIITHWNDSVKQEVQNLIKDKGVNSFM 111-165    |
|                                              | : EP SSL ++EKW E AD KSCCDY+LHVDIT W D V++E++ L++DKGVNSF              |
| Q14194                                       | : EPGSSLLTSFEKWHEAADTKSCCDYSLHVDIITSWYDGVREELEVLVQDKGVNSFQ 111-165   |
| Query                                        | : VYMAYKDLVQVSNTELYEIFTCLGELGAIQVHAENGDIIAQEQTRMLEMGITGP 166-220     |
|                                              | : VYMAYKD+YQ+S+++LYE FT L LGA+ VHAENG+IAQEQ R+LEMGITGP               |
| Q14194                                       | : VYMAYKDVYQMSDSQLYEAFTFLKGLGAVILVHAENGDIIAQEQKRILEMGITGP 166-220    |
| Query                                        | : EGHVLSRPEELEAEAVFRAITIASQTNCPYVTKVMSKSAADLISQARKKGNVVF 221-275     |
|                                              | : EGH LSRPEELEAEAVFRAITIA + NCP+Y+TKVMSKSAAD+I+ ARKKG +VF            |
| Q14194                                       | : EGHVLSRPEELEAEAVFRAITIAGRINCPVYITKVMKSAADIILARKKGPLVF 221-275      |
| Query                                        | : GEPITASLGIDGTHYWSKNWAKAAAFVTSPLSPDPTTDPYINSLLAGDQLQSG 276-330      |
|                                              | : GEPI ASLG DGTHYWSKNWAKAAAFVTSPLSPDPTTDPY+ SLLA GDLQ++G             |
| Q14194                                       | : GEPIAASLGTGTHYWSKNWAKAAAFVTSPLSPDPTTDPYLTSLLAGDQLQVTVG 276-330     |
| Query                                        | : SAHCTFSTAQKAIGKDNFTAIPEGTNGVEERMSVIWDKAVATGKMDENQFVAVTS 331-385    |
|                                              | : S HC +STAQKA+GKDNFT IPEG NG+EERM+V+WDKAVATGKMDENQFVAVTS            |
| Q14194                                       | : SGHCPYSTAQKAVGKDNFTLIEGTVNGIEERMVVDKAVATGKMDENQFVAVTS 331-385      |
| Query                                        | : TNAAKIFNLYPRKGRISVGSDDLVIWDPDAVKIVSAKNHQSAAEYNI FEGMELR 386-440    |
|                                              | : TNAAKIFNLYPRKGRIVGSDD+D+VIWDPD +K ++AK+H+SA EYNI FEGME             |
| Q14194                                       | : TNAAKIFNLYPRKGRIVGSDDADVVIWDPDKLKITAKSHKSAVEYNI FEGMECH 386-440    |
| Query                                        | : GAPLVVICQGGKIMLEDGNLHVTTQAGRFIPCSFSDYVYKRIKARRKQADLHVP 441-495     |
|                                              | : G+PLVVI QGKI+ EDGN++V +G GRFIP F +++Y+R+K R K+ L V                 |
| Q14194                                       | : GSPLVVISQGGKIVFEDGNINVNKGMGRFIPRKAFFPEHLYQVVKIRNKVFGVQVGS 441-495  |
| Query                                        | : RGMVDGPFVFDLTTTPKGGT PAGESARGSPTRPN-PPVRNLHQSGFSLSGTQVDE-G 496-548 |
|                                              | : RGMVDGPF+++ TPK TPA SA+ SP++ PP+RNLHQ S FSLSG Q+D+                 |
| Q14194                                       | : RGMVDGPFVYEPATPKYAT PAPSAKSSPSKHQPPPIRNLHQSNFSLSGAQIDDNN 496-550   |
| Query                                        | : VRSASKRIVAPPGRSNITSL 549-569                                       |
|                                              | : R RIVAPPGRSNITSL                                                   |
| Q14194                                       | : PRRIGHRIVAPPGRSNITSL 551-571                                       |

e. Sequence homology between DRP3 and DRP2

| 90.0%                                                                               |                                                                      |
|-------------------------------------------------------------------------------------|----------------------------------------------------------------------|
| Graphical alignment                                                                 |                                                                      |
| In original sequence: 1 - 569 ( total: 570 )                                        |                                                                      |
|  |                                                                      |
| Raw alignment                                                                       |                                                                      |
| Query                                                                               | : MSYQGKKNIPRITSDRLLIKGGRIVNDQSFYADIYMEDGLIKQIGDNLIVPGGV 1-55        |
|                                                                                     | : MSYQGKKNIPRITSDRLLIKGG+IVNDQSFYADIYMEDGLIKQIG+NLIVPGGV             |
| Q16555                                                                              | : MSYQGKKNIPRITSDRLLIKGGKIVNDQSFYADIYMEDGLIKQIGENLIVPGGV 1-55        |
| Query                                                                               | : KTIEANGKMVIPGGIDVHTHFQMPYKGMTTVDDFFQGTKAALAGGTTMIIDHVVP 56-110     |
|                                                                                     | : KTIEA+ +MVIPGGIDVHT FQMP +GMT+ DDDFFQGTKAALAGGTTMIIDHVVP           |
| Q16555                                                                              | : KTIEAHSRMVIPGGIDVHTRFQMPDQGMTSADDDFFQGTKAALAGGTTMIIDHVVP 56-110    |
| Query                                                                               | : EPESSLTEAYEKWREWADGKSCCDYALHVDITHWNDSVKQEVQNLKDKGVNSFM 111-165     |
|                                                                                     | : EP +SL A+++WREWAD KSCCDY+LHVDI+ W+ +++E++ L+KD GVNSF+              |
| Q16555                                                                              | : EPGTSLLAAPFDQWREWADSKSCCDYSLHVDISEWHKGIQEEMEALVKDHGVNSFL 111-165   |
| Query                                                                               | : VYMAKDLYQVSNTELYEIFTCLGELGAIQVHAENGDIIEAQEQTRMLEMGITGP 166-220     |
|                                                                                     | : VYMA+KD +Q+++ ++YE+ + + ++GAIQVHAENGDIIEA+EQ R+L++GITGP            |
| Q16555                                                                              | : VYMAFKDRFQLTDCQIYEVLSVIRDIGAIQVHAENGDIIEEQQRILDGLGITGP 166-220     |
| Query                                                                               | : EGHVLSRPEELEAEAVFRAITIASQTNCPYLVTKVMSKSAADLISQARKKGNVVF 221-275    |
|                                                                                     | : EGHVLSRPEE+EAEAV RAITIA+QTNCPY+TKVMSKSA++I+QARKKG VV+              |
| Q16555                                                                              | : EGHVLSRPEEVEAEAVNRAITIANQTNCPYITKVMSKSAEVIAQARKKGTVVY 221-275      |
| Query                                                                               | : GEPITASLGIDGTHYWSKNWAKAAAFVTSPPSPDPTTDPDYINSLLASGDLQLSG 276-330    |
|                                                                                     | : GEPITASLG DG+HYWSKNWAKAAAFVTSPPSPDPTTDPD++NSLL+ GDLQ++G            |
| Q16555                                                                              | : GEPITASLGDGSHYWSKNWAKAAAFVTSPPSPDPTTDFLNSLLSCGDLQVTG 276-330       |
| Query                                                                               | : SAHCTFSTAQKAIGKDNFTAIPEGTINGVEERMSVIWDKAVATGKMDENQFVAVTS 331-385   |
|                                                                                     | : SAHCTF+TAQKA+GKDNFT IPEGTING EERMSVIWDKAV TGKMDENQFVAVTS           |
| Q16555                                                                              | : SAHCTFNSTAQKAVGKDNFTLIPPEGTINGTEERMSVIWDKAVVTGKMDENQFVAVTS 331-385 |
| Query                                                                               | : TNAAKIFNLYPRKGRI+VGSDDLVIWDPDAVKIVSAKHNQSAEYNI FEGMELR 386-440     |
|                                                                                     | : TNAAK+FNLYPRKGRI+VGSDDLVIWDPD+VK +SAK H S+ EYNI FEGME R            |
| Q16555                                                                              | : TNAAKVFNLYPRKGRIAVGSDADLVIWDPD+VKTISAKTHNSSEYNI FEGMECR 386-440    |
| Query                                                                               | : GAPLVVICQGKIMLEDGNLHVTQGAGRFPICSPFSDYVYKRIKARRKMDLHAVP 441-495     |
|                                                                                     | : G+PLVVI QGKI+LEDG LHVT+G+GR+IP PF D+VYKRIKAR ++A+L VP              |
| Q16555                                                                              | : GSPLVVISQGKIVLEDGTLHVTEGSGRYIPRKPFPDFVYKRIKARSRLAELRGVP 441-495    |
| Query                                                                               | : RGMVDGPFVFDLTTTPKGGTPAGSARGSPTRPN-PPVRNLHQSGFSLSGTQVDEGV 496-549   |
|                                                                                     | : RG+YDGPV +++ TPK TPA SA+ SP + PPVRNLHQSGFSLSG Q+D+ +               |
| Q16555                                                                              | : RGLYDGPVCEVSVTPKTVTPASSAKTSPAKQQAPPVRNLHQSGFSLSGAQIDDNI 496-550    |
| Query                                                                               | : -RSASKRIVAPPGGRSNIISL 550-569                                      |
|                                                                                     | : R ++RIVAPPGGR+NIISL                                                |
| Q16555                                                                              | : PRRTTQRIVAPPGGRANITSL 551-571                                      |

f. Sequence homology between DRP3 and DRP4

| 86.0%                                        |                                                                    |
|----------------------------------------------|--------------------------------------------------------------------|
| Graphical alignment                          |                                                                    |
| In original sequence: 1 - 570 ( total: 570 ) |                                                                    |
| Raw alignment                                |                                                                    |
| Query                                        | : MSYQGKKNIPRITSDRLLIKGGRIVNDDQSFYADIYMEDGLIKQIGDNLIVPGGV 1-55     |
|                                              | : MS+QGKK+IPRITSDRLLI+GGRIVNDDQSFYAD+++EDGLIKQIG+NLIVPGG+          |
| O14531                                       | : MSFQGKKSIPRITSDRLLIRGGRIVNDDQSFYADVHVEDGLIKQIGENLIVPGGI 1-55     |
| Query                                        | : KTIEANGKMVIPGGIDVHTHFQMPYKGMTTVDDFFQGTKAALAGGTMIIDHVVP 56-110    |
|                                              | : KTI+A+G MV+PGG+DVHT QMP GMT DDF QGTKAALAGGTMI+DHV P              |
| O14531                                       | : KTIDAHGLMVLPGGVDVHTRLQMPVLGMTPADDFCQGTKAALAGGTMIIDHVFP 56-110    |
| Query                                        | : EPESLLEAYEKREWADGKSCCDYALHVDITHWNDSVKQEVQNLIKDKGVNSFM 111-165    |
|                                              | : + SL AYE+WRE AD +CCDY+LHVDIT W++S+K+E++ L+K+KGVNSF+              |
| O14531                                       | : DTGVSLLAAYEQWRERADSAACCDYSLHVDITRWHEHSIKEELEALVKEKGVNSFL 111-165 |
| Query                                        | : VYMAYKDLYQVSNTELYEIFTCLGELGAIQVHAENGDI IAQEQTRMLEMGITGP 166-220  |
|                                              | : V+MAYKD Q S++++YEIF+ + +LGA+AQVHAENGDI+ +EQ R+LE+GITGP           |
| O14531                                       | : VFMAYKDRQCSDSQMYEIFSIIIRDLGALAQVHAENGDIVEEEQKRLELGITGP 166-220   |
| Query                                        | : EGHVLSRPEELEAEAVFRAITIASQTNCPYVTKVMSKSAADLISQARKKGNVVF 221-275   |
|                                              | : EGHVLS PEE+EAEAV+RA+TIA Q NCPLYVTKVMSK AAD I+QA+++G VVF          |
| O14531                                       | : EGHVLSHPVEEAEAVYRAVTIAKQANCPYVTKVMSKGAADAIAQAKRRGVVVF 221-275    |
| Query                                        | : GEPITASLGIDGTHYWSKNWAKAAAFVTSPPSPDPTTPDYINSLASGDLQLSG 276-330    |
|                                              | : GEPITASLG DG+HYWSKNWAKAAAFVTSPP++PDPTT D++ LL+SGDLQ++G           |
| O14531                                       | : GEPITASLGTGSHYWSKNWAKAAAFVTSPPVNPDPPTADHLTCLLSSGDLQVTG 276-330   |
| Query                                        | : SAHCTFSTAQKAIGKDNFTAIPEGTINGVEERMSVIWDKAVATGKMDENQFVAVTS 331-385 |
|                                              | : SAHCTF+TAQKA+GKDNF IPEGTING+EERMS++W+K VA+GKMDEN+FVAVTS          |
| O14531                                       | : SAHCTFTTAQKAVGKDNFALIPEGTINGIEERMSMVWEKCVASGKMDENEFVAVTS 331-385 |
| Query                                        | : TNAAKIFNLYPRKGRISVGSDDLVIWDPDAVKIVSAKNHQSAEYNI FEGMELR 386-440   |
|                                              | : TNAAKIFN YPRKGR++VGSD+DLVIW+P A KI+SAK H EYNIFEG+E R             |
| O14531                                       | : TNAAKIFNFYPRKGRVAVGSDADLVIWNPKATKIISAKTHNLNVEYNI FEGVECR 386-440 |
| Query                                        | : GAPLVVICQGKIMLEDGNLHVTQAGGRFIPCSFSDYVYKRIKARRKMADLHAVP 441-495   |
|                                              | : GAP VVI QG++ LEDG + VT GAGRF+P F D+VYKRIKAR ++A++H VP            |
| O14531                                       | : GAPAVVISQGRVALEDGKMFVTPGAGRFVPRKTFPDFVYKRIKARNRLAEIHGVP 441-495  |
| Query                                        | : RGMVDGPFVDLTTTPKGGTPAGSARGSPTRPN-PPVRNLHQSGFSLSGTQVDEGV 496-549  |
|                                              | : RG+YDGPV ++ K G+ A + P + + PPVRNLHQSGFSLSG+Q D+ +                |
| O14531                                       | : RGLYDGPVHEVMVPAKPGSGAPARASCPGKISVPPVRNLHQSGFSLSGSQADDHI 496-550  |
| Query                                        | : -RSASKRIVAPPGGRSNITSLS 550-570                                   |
|                                              | : R +++I+APPGGRSNITSLS                                             |
| O14531                                       | : ARRTAQKIMAPPGGRSNITSLS 551-572                                   |
