# Supplementary material
Source: PubMed Central journal article supplement (PMC5527921)

Supplementary figure 1

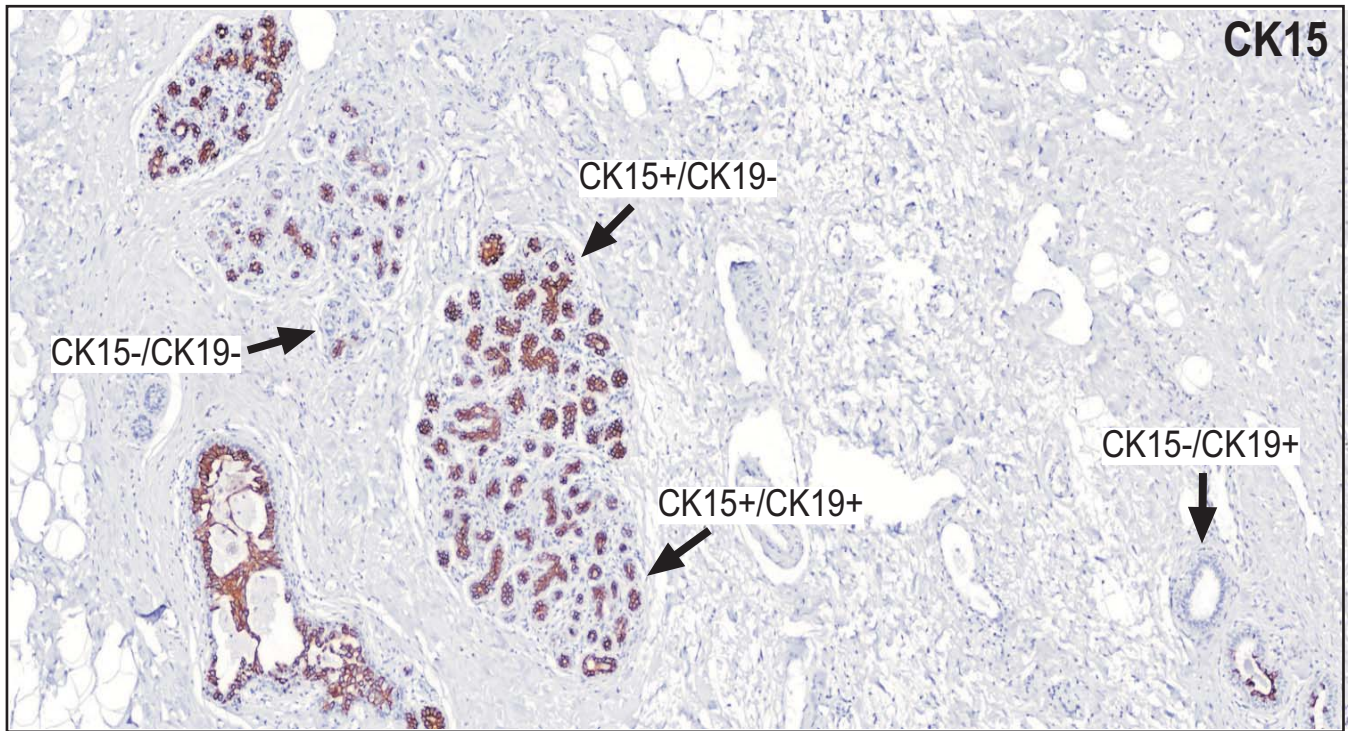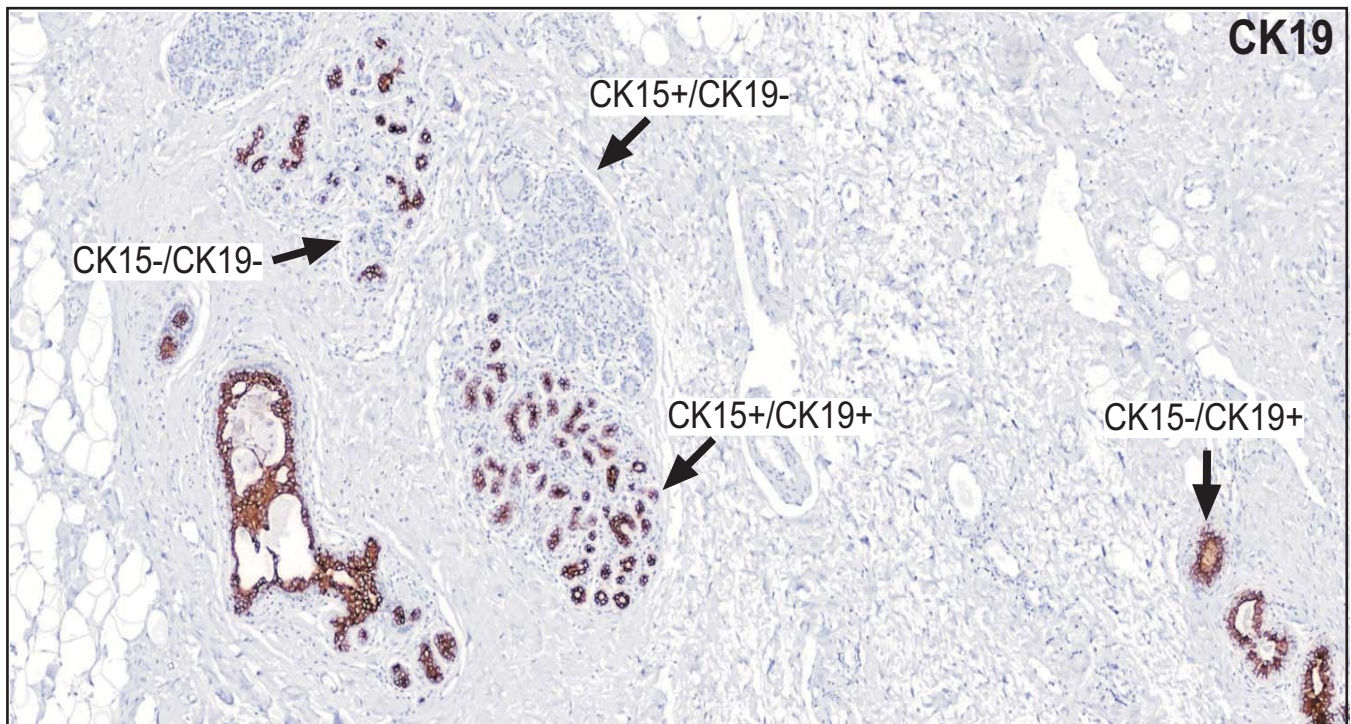

Supplement: MOL2-4-539-s001.pdf [file MOL2-4-539-s001.pdf]

Supplementary figure 2

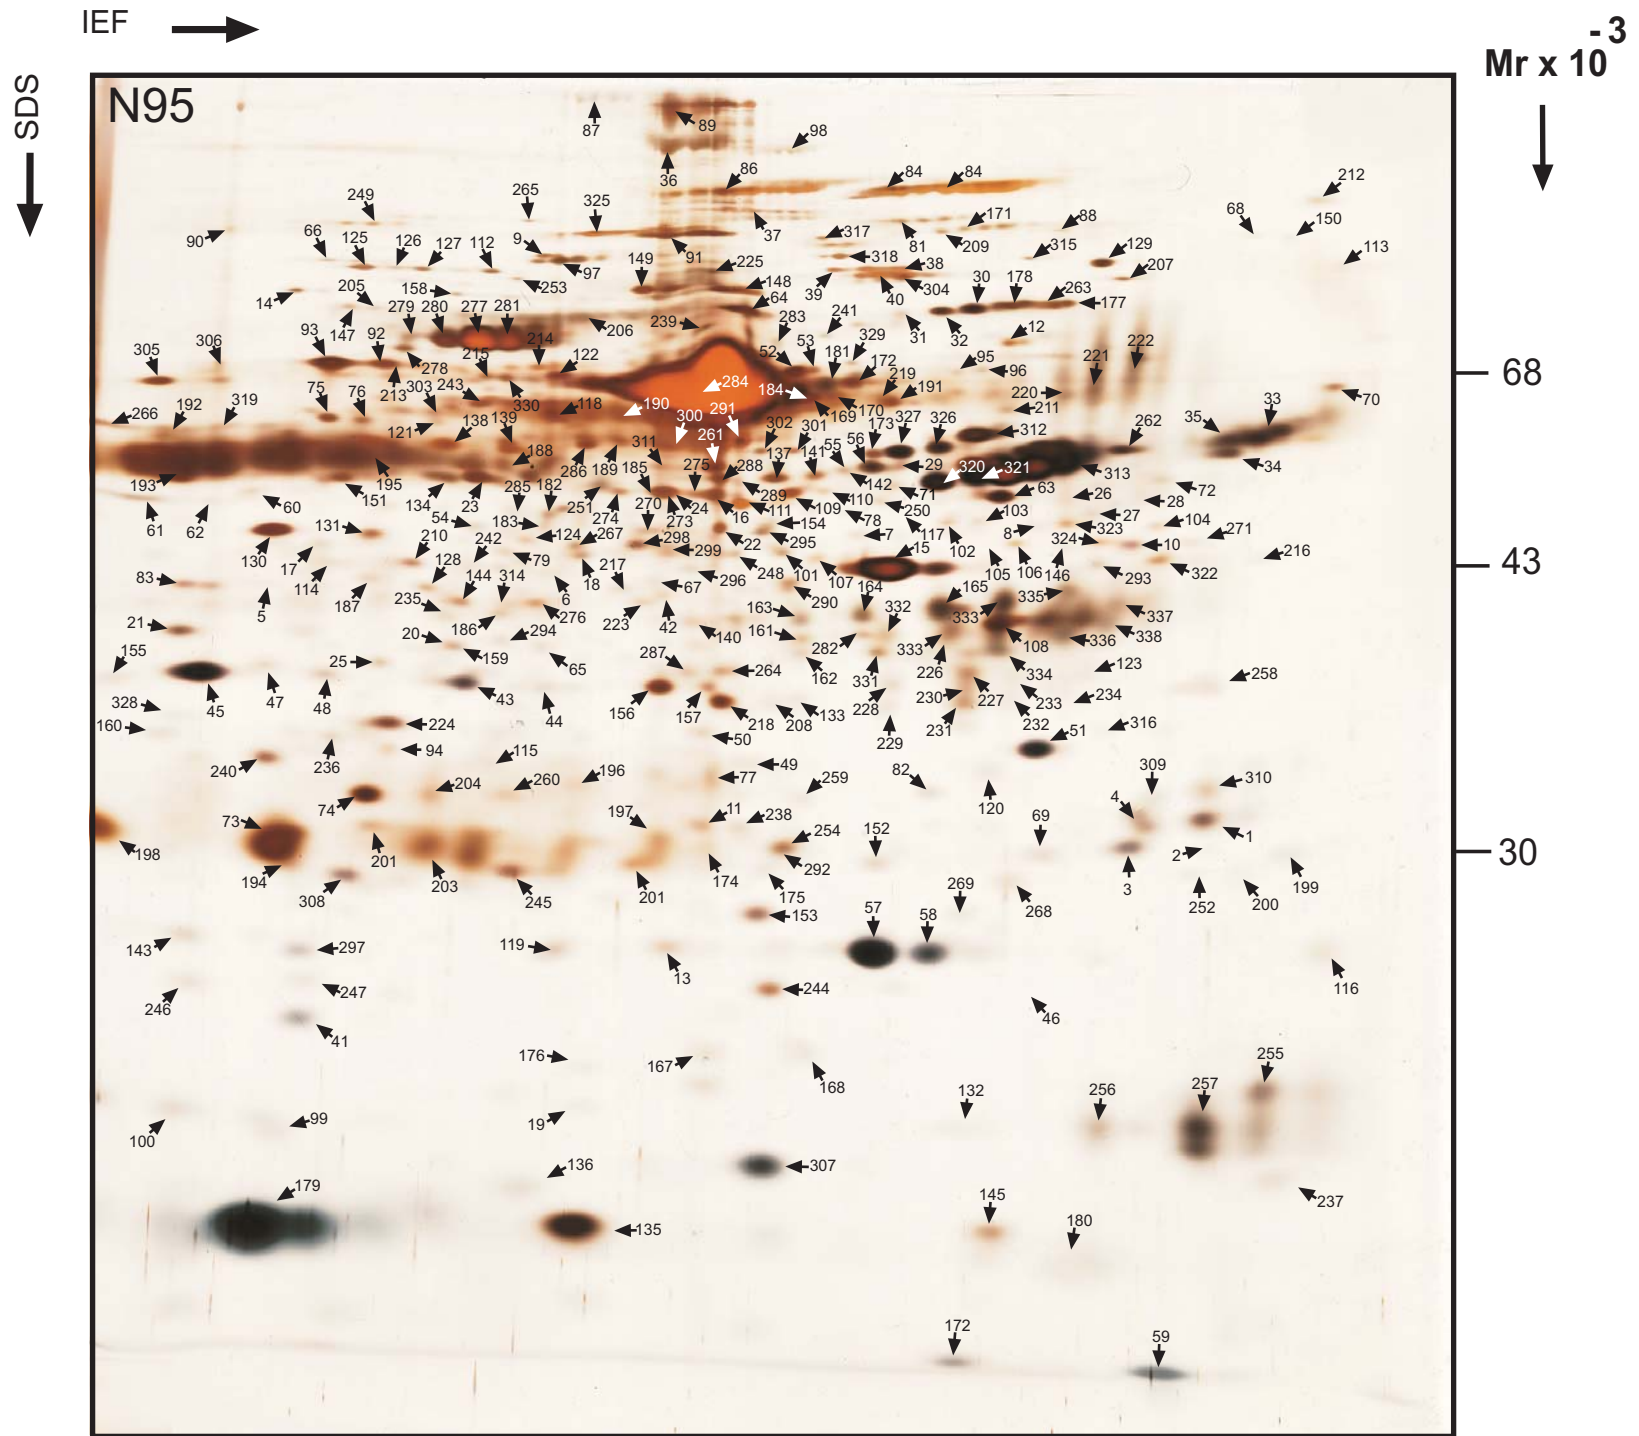

Supplement: MOL2-4-539-s003.pdf [file MOL2-4-539-s003.pdf]

# Supplementary figure 4

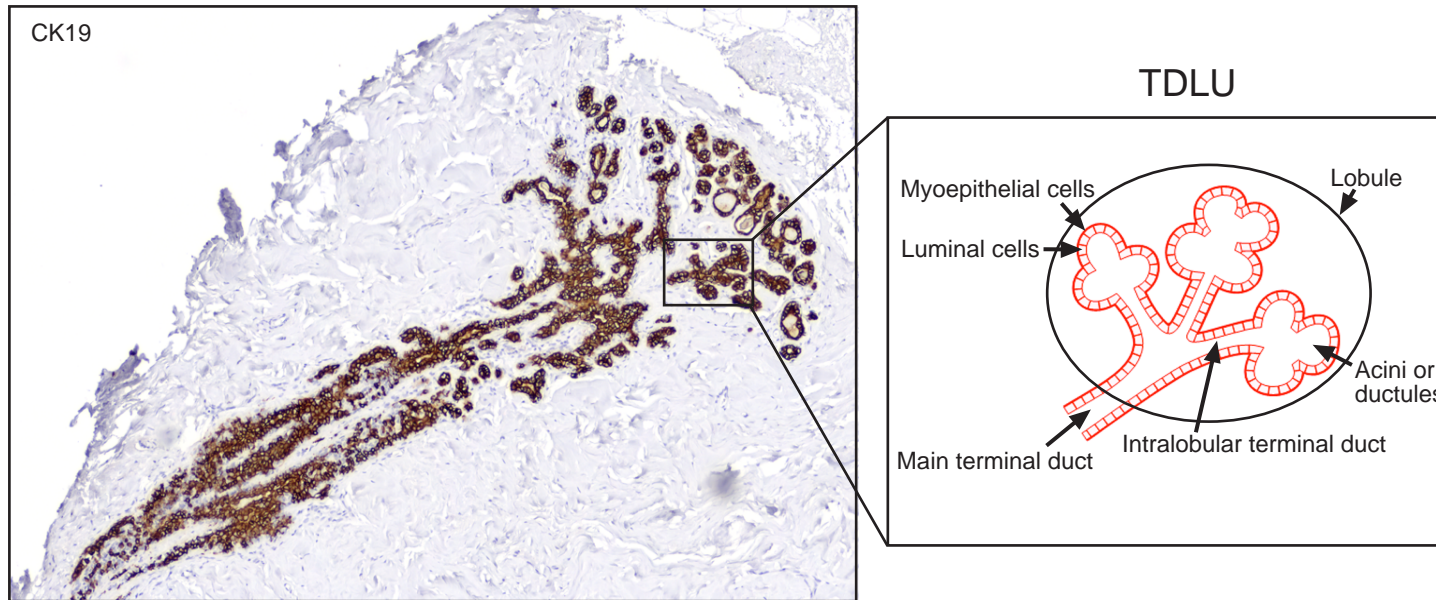

Supplement: MOL2-4-539-s005.pdf [file MOL2-4-539-s005.pdf]

## Supplementary figure 5

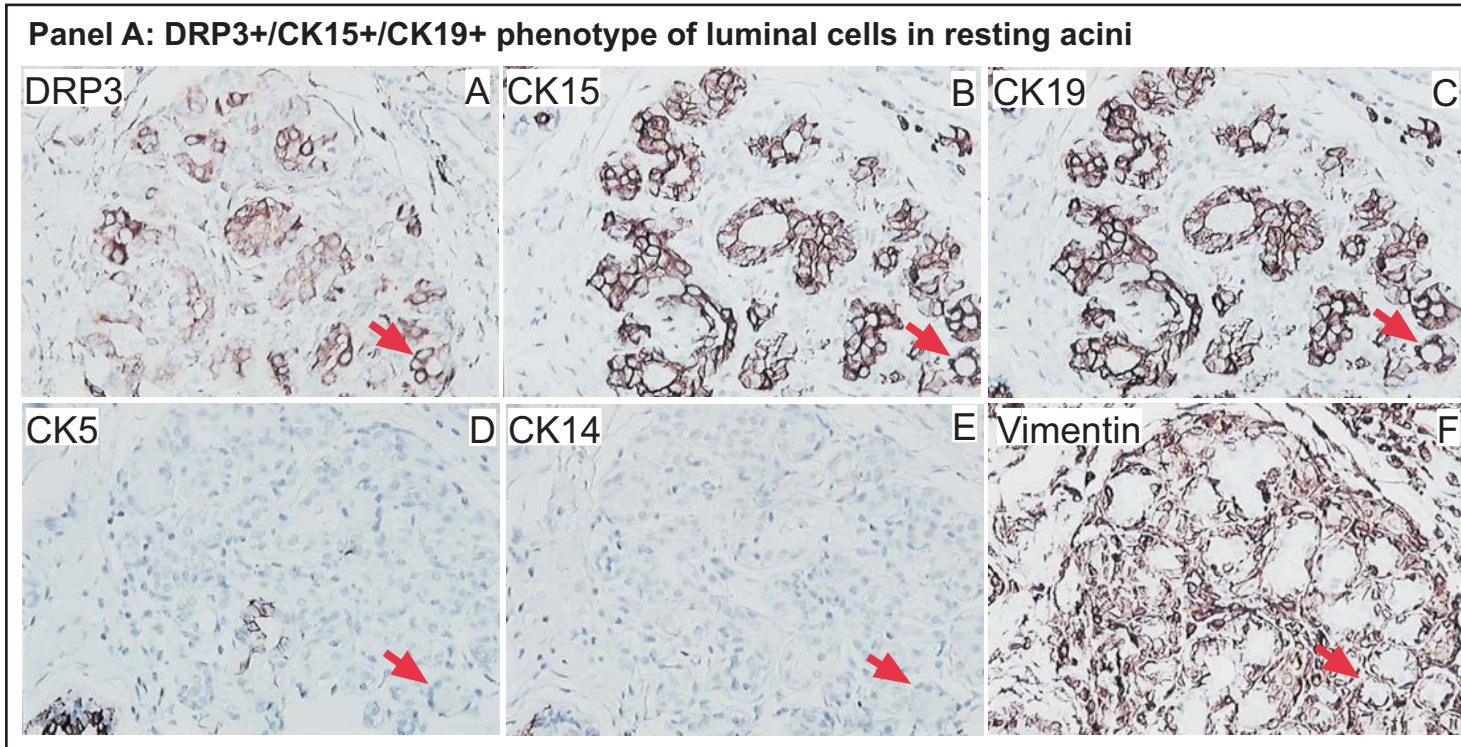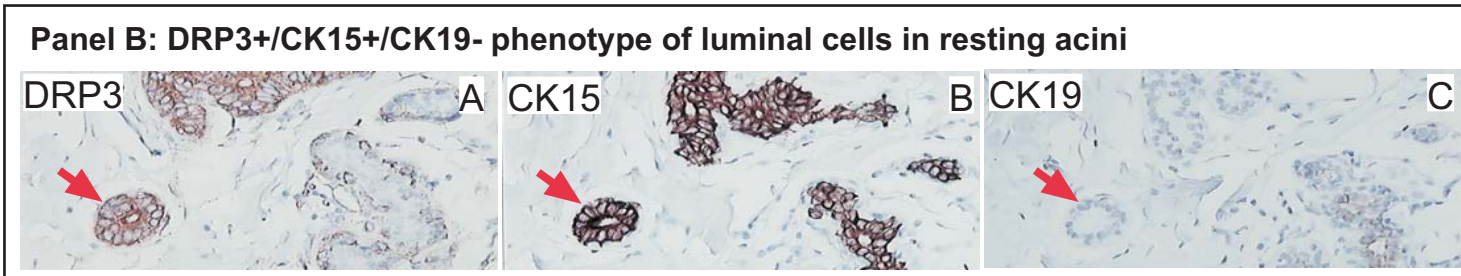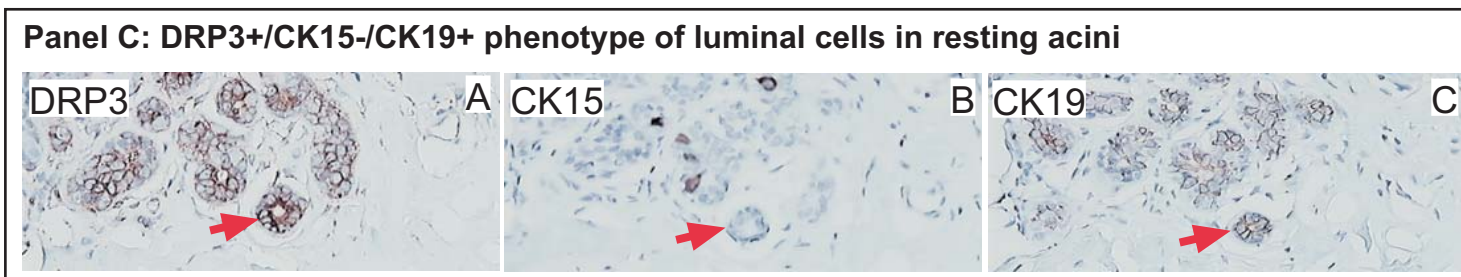

Supplement: MOL2-4-539-s006.pdf [file MOL2-4-539-s006.pdf]
